# Supplementary material for: Design of an ozone and nitrogen dioxide sensor unit and its long-term operation within a sensor network in the city of Zurich
Source: Copernicus journal article supplement (doi:10.5194/amt-2017-22), 2017-03-15
Supplement: Supplementary file [file amt-2017-22-AC1-supplement.zip]

# **Reply to the comments of reviewer #2 on the manuscript „Design of an ozone and nitrogen dioxide sensor unit and its long-term operation within a sensor network in the city of Zurich“**

Michael Müller<sup>1</sup>, Jonas Meyer<sup>2</sup> and Christoph Hüglin<sup>1</sup>

<sup>1</sup>Empa, Swiss Federal Institute of Materials Science and Technology, Dübendorf, Switzerland.

<sup>2</sup>Decentlab GmbH, Dübendorf, Switzerland.

We thank the reviewer for his effort in evaluating this manuscript and for his valuable suggestions for improvements. All points made by the reviewer are addressed on the following pages.

## **Section 5.2. Sensors in agreement?**

**Response:** We state in this section that the sensors, in general, are coherent and that time-dependent parameters in the sensor model reduce RMSE and absolute difference between the sensors. This is the main statement. Corresponding numeric values are shown in Figure 6.

**Modification:** We made some changes in this section based on a comment of reviewer #3.

## **Section 4.2. Better model to use?**

**Modification:** We added a sentence at the end of this section referring to table 4 where under DS3 the models are summarized that we think performed best.

## **Reviewer #2 asks to comment why O<sub>3</sub> sensors perform better than NO<sub>2</sub> sensors in the study of Lewis et al. (2016)**

**Response:** Lewis et al. (2016) tested in their study five different types of electrochemical sensors from Alphasense (CO<sub>2</sub>, O<sub>3</sub>, NO, NO<sub>2</sub> (B4), SO<sub>2</sub>). In our study electrochemical Alphasense NO<sub>2</sub> (B4, B42F) and Aeroqual metal oxide O<sub>3</sub> sensors were tested. Sensors for particular species produced by certain manufacturers differ by working principles, design and electronics and have to be analysed specifically. In our opinion, the studies are not contradictory but complement each other.

**Modification:** We included the working principles of the O<sub>3</sub> and NO<sub>2</sub> sensors in the beginning of section 3.1.

## **Abstract, line 9: Perhaps you could indicate the accuracy of the diffusion tubes?**

**Modification:** We included the accuracy of the diffusion tubes in the abstract.

## **Abstract: It would be worth also mentioning how the ozone sensors performed, a part from their accuracy?**

**Modification:** We added a sentence reporting that the sensitivity of the O<sub>3</sub> sensors decreased over time.

**Section 2.2.1: It was not clear to me where the sites used were located? I suggest amending Table 1 to include how far the AQM/reference sites were from the sensor units, this is important information when understanding the calibrations and corrections applied later.**

**Modification:** We included in table 1 the distance of the locations of the sensor network to the nearest AQM site as well as the distance to AQM site ZUE. In addition, we refer in the legend of table 1 to the map included in the supplementary materials showing the AQM sites and the network location sites.

**Section 3.1: Why were only 2 ozone sensors used and not three like for NO<sub>2</sub>? How can you be sure which ozone sensor was correct?**

**Response:** Actually, in first field test measurements the O<sub>3</sub> sensors showed a high performance and proofed to work reliably. It only showed during longer-term deployment that the O<sub>3</sub> sensors suffered from a changing response behaviour. Taking this prior experience and the costs for redundant sensors into account, we decided to work with a two ozone sensor configuration. Ozone sensors of two sensor units exhibited largely differing ozone values during operation. In these cases we focused on the sensor providing the more plausible measurements with respect to measurements from AQM sites.

The reviewer is right that with a two sensor configuration the malfunctioning device cannot be identified if there are differences between the two sensors and both sensors report plausible values. However, correspondence of measurements from two sensors does not necessarily mean that the sensors work properly neither. They just might have been impacted by identical environment factors leading to degradation of the sensors. Therefore, we pointed out in the manuscript that a sensor performance analysis strategy is necessary for the operation of a sensor network.

**Modification:** No changes.

**Section 3.3, line 11? What does  $\Delta t_0$  represent and how exactly did you measure it in the field?**

**Response:** The parameter  $\Delta t_0$  represents the time when the impact of a particular change in relative humidity on the sensor signal decayed to 0.37 of its initial value (see Eq. 2). We did not measure the parameter but computed several models with different values for  $\Delta t_0$ . We set  $\Delta t_0$  to the value of the best performing model.

**Modification:** We added a sentence in section 3.3 explaining the method of finding the optimal value for  $t_0$ .

**Section 3.3, line 18-19: I think you should expand this discussion, is just RH and NO<sub>2</sub> that the sensor is responding to?**

**Response:** As stated we did not find any cross-sensitivities of the NO<sub>2</sub> sensors to other gases in our experiments. The (slight) impact of temperature on the signal is discussed in section 4.3. Therefore, we do not see how we could substantially expand the discussion.

**Modification:** No changes.

**Section 4.1: I found the description of the different data sets a bit confusing. Was the 10% of the data selected from the whole time series for the calibration(whole year)? The reported concentrations for NO<sub>2</sub> and O<sub>3</sub>, were these for the 10% of the selected data for the calibration? I suggest that this paragraph is re-worded to clarify what data sets were used for calibration of each model.**

**Modification:** We reworded section 4.1. in order to improve clarity.

**Section 4.2, line 26: Which variables were used in the model?**

**Response:** That is already explained in section 4.2., page 8, lines 1 to 9.

**Modification:** We added a sentence after discussion of the sensor model performance in section 4.3 that in table 4 the models are specified which we consider to provide the best data.

**Page 9, line 20: Please re-word, I wasn't sure what became evident of the ozone sensors.**

**Modification:** We reworded the sentence.

**Section 5.1, line 6: Should you remove the negative values? Won't this give a positive bias to your averaging?**

**Response:** The "sensor unit NO<sub>2</sub>/O<sub>3</sub> measurement"  $S_u(t_i)$  for a one minute interval is computed based on the particular NO<sub>2</sub>/O<sub>3</sub> sensor measurements  $S_1(t_i)$ ,  $S_2(t_i)$ ,  $S_3(t_i)$ . Although negative concentrations do not exist negative sensor values  $S_i(t_i)$  may result for an individual sensor if the applied statistical sensor model does not entirely capture the physical sensor behaviour.

For the computation of 30 minutes mean "sensor unit measurements"  $S_u(30 \text{ min})$  negative one minute "sensor unit measurements"  $S_u(t_i)$  were treated as zero concentrations. As the reviewer points out the average value obtained with this procedure is equal (in case of non-negative averages only) or larger than that obtained without equating to zero negative values. We do not expect that the error term associated with negative values is cancelled out for 30 minutes averages. So the procedure of setting negative values to zero most likely leads to more accurate values.

During manuscript preparation it has been forgotten that we set negative O<sub>3</sub> sensor values to zero for the computation of the RMSE used for the comparison of different O<sub>3</sub> sensor models. We treated NO<sub>2</sub> and O<sub>3</sub> differently by two reasons: First, we thought at the beginning of the study the O<sub>3</sub> sensors might be usable for correcting the O<sub>3</sub> cross-sensitivity of the NO<sub>2</sub> B4 sensors. The use of negative concentrations would not have been appropriate in this context. Second, we used only O<sub>3</sub> values larger than 2 ppb for the estimation of the sensor model parameters. However, the statements in the manuscript do not change.

**Modification:** We reworded section 5.1 accordingly. We specify more accurately the computation of the RMSE in section 4.3 and in Figure 4.

**Section 5.3: In Fig 7, there appears to be a seasonal trend, with greater discrepancy between the sensors and the diffusion tubes during the summer compared to winter? Perhaps the authors could consider why this may have occurred?**

**Response:** For the sensor unit located at BUE large (>5 ppb) and long-term discrepancies with respect to NO<sub>2</sub> diffusion tubes were encountered in the summer seasons. Location BUE is next to a busy road and close to Lake Zurich (< 100 m).

Diffusion tubes may exhibit dependencies on external factors such as temperature, humidity or wind speed. The used diffusion tubes as well as the mountings were identical at all locations. The comparison between the diffusion tubes and the measurements from the reference instruments showed no large differences for this time period. An issue with the diffusion tubes is not obvious.

We have no meteorological measurements for site BUE and the other locations of the sensor network except for the temperature and humidity sensors inside the sensor units. Thus, knowledge of the differences in environment conditions is limited.

In summary, we think that the data basis is not sufficient for substantially resolving the cause for the differences between the sensor and diffusion tube measurements.

**Modification:** No changes.

**Section 5.5: Why did the ozone sensors have such poor agreement at the end when the NO<sub>2</sub> sensors did not have this issue? You mentioned earlier the issue of them being clogged by airborne particles, was this a contributing factor? How come the agreement was poor when the ozone sensors were still reasonably correlated with the reference instrument? In addition, it is also not clear here how the measurements at AQM differ to the reference instruments?**

**Response:** The Alphasense NO<sub>2</sub> sensor is an electrochemical sensor whereas the Aeroqual O<sub>3</sub> sensor is a metal oxide sensor. They exhibited almost identical environment conditions during operation but cannot directly be compared as they are based on different working principles.

Figure 10 shows that the NO<sub>2</sub> sensors measurements (DS 2) of two SU are reasonably in agreement with measurements from reference instruments after more than one year of operation while the O<sub>3</sub> sensors are not. This study focuses on data analysis. We have no detailed information about the design of the sensors. Therefore, we are limited in the interpretation of our findings related to technical aspects of the sensors. We reported our observations to the manufacturer and received several suggestions. We refrain from further interpretations as they would remain speculations.

**Modification:** We included the working principles of the O<sub>3</sub> and NO<sub>2</sub> sensors in the beginning of section 3.1.

**Figure 2: I found this figure hard to understand; it wasn't clear to me how it depicts 3 tests, perhaps because the y-axis has many parameters. I suggest simplifying by only including the most relevant data, or splitting into multiple plots.**

**Modification:** We split Figure 2 (a) into four subplots in order to improve clarity.

**Figure 3: What do the two columns of numbers on the left of the plots represent? I would also indicate what RMSE represents in the caption.**

**Response:** The meaning of these numbers is explained in the last line of the figure caption.

**Modification:** We added the meaning of RMSE in the figure caption.

#### **Technical Comments:**

Page 6 line 21: Should it read 'may both experience interference with temperature and humidity'?

→ Corrected.

Page 7 line 8: should it read: 'calibration of the sensors for all the SUs'

→ We slightly changed the sentence in order to improve clarity.

Page 8, line 14: Obviously is mis spelt.

→ Corrected.

Page 9, line 18: Progressively rather than progressionally?

→ Corrected.

Page 10, line 18-19: Please indicate the figure number, I'm guessing 6?

→ Figure number 6 is already written on page 10, line 18. We changed a "the" to "this" in order to make clear we refer to the same figure again.

Page 11: line 26-7: please indicate the figure numbers.

→ Figure number 9 is already written on page 11, line 26. We changed a "the" to "this" in order to make clear we refer to the same figure again.
